# Supplementary material
Source: PubMed Central journal article supplement (PMC8847233)
Supplement: NIHMS1763516-supplement-Supplemental_Publication_Material.pdf [file NIHMS1763516-supplement-Supplemental_Publication_Material.pdf]

**SUPPLEMENTAL MATERIALS**

A. Supplemental Figures

Figure I. Derivation of Study Group.

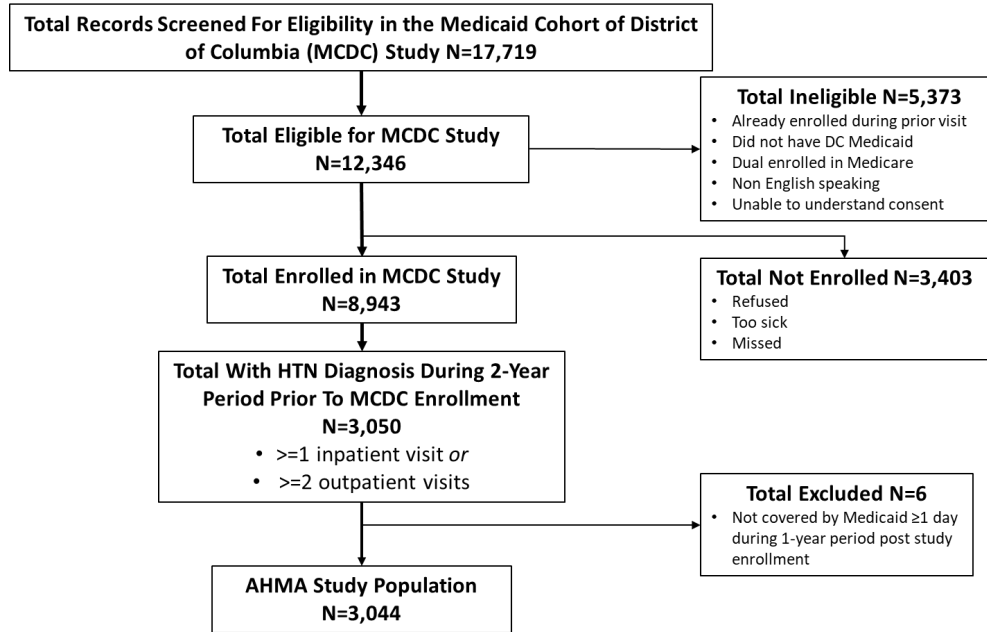

Figure 1 Legend. MCDC=Medicaid Cohort of District of Columbia. HTN=hypertension. AHMA=Antihypertensive Medication Adherence.

## B. Supplemental Table.

Supplemental Table I. Comparison of Adjusted Odds Ratio of Having An Antihypertensive Medication During the Follow-Up Period For Full Sample Versus Excluding Participants With Primary Non Adherence.

| Characteristic                             | Main Analysis*<br>Odds Ratio (95% CI) ‡<br>N=3,044 | Sensitivity Analysis†<br>(excluding PDC=0) ‡<br>N=2,444 |
|--------------------------------------------|----------------------------------------------------|---------------------------------------------------------|
| Social Risk Group¶                         |                                                    |                                                         |
| Social risk group 2 vs social risk group 1 | 0.95 (0.80, 1.11)                                  | 0.99 (0.84, 1.16)                                       |
| Social risk group 3 vs social risk group 1 | 0.8 (0.70, 0.93)                                   | 0.83 (0.72, 0.96)                                       |
| Social risk group 4 vs social risk group 1 | 0.64 (0.53, 0.78)                                  | 0.74 (0.60, 0.91)                                       |
| Age and Sex                                |                                                    |                                                         |
| Males vs female                            | 0.85 (0.76, 0.96)                                  | 0.91 (0.81, 1.02)                                       |
| Age 40 -54 vs age 18 - 39                  | 2.61 (2.23, 3.04)                                  | 1.98 (1.70, 2.32)                                       |
| Age 55+ vs age 18 - 39                     | 3.28 (2.77, 3.89)                                  | 2.33 (1.96, 2.76)                                       |

\*Main analysis includes all N=3,044 participants.

† Sensitivity analysis excludes N=600 participants who did not fill at least one antihypertensive medication during the follow-up period.

‡ Adjusted for the natural spline of the chronic disability payment system, age and sex.

¶ Social risk group 1="employed and fewest social risks"; social risk group 2="employed and high financial strain; social risk group 3="unemployed and limited internet and car access"; social risk group 4="unemployed and many social risks"
